# Supplementary material for: Environmental Impacts of Specific Recyclates in European Battery Regulatory-Compliant Lithium-Ion Cell Manufacturing
Source: MDPI journal article supplement (doi:10.3390/su15010103), 2022-12-21
Supplement: s1 [file s1]

## Supporting Information

# **Environmental Impacts of Specific Recyclates in European Battery Regulatory Compliant Lithium-Ion Cell Manufacturing**

Leonard Kurz <sup>1,\*</sup>, Simeon Forster <sup>1</sup>, Ralf Wörner <sup>1</sup> and Frederik Reichert <sup>1,\*</sup>

<sup>1</sup> Esslingen University of Applied Sciences, Institute for Sustainable Energy Technology and Mobility (INEM); Esslingen – Esslingen University of Applied Sciences, Kanalstr. 33, 73728 Esslingen, Germany

\* Correspondence: Leonard.Kurz@hs-esslingen.de; Frederik.Reichert@hs-esslingen.de

# Table of Content

I. Battery compositions..... 2

II. Sensitivity analysis ..... 6

III. Mass-proportional allocation ..... 7

IV. Pristine Materials Impact..... 7

V. Unit Processes Life Cycle Inventories..... 8

References..... 10

# I. Battery compositions

Table S1: Composition of the battery pack from Dai et al. [1]

| Battery pack      | 1     | kg |
|-------------------|-------|----|
| Module components | 4.49  | %  |
| Pack components   | 21.91 | %  |
| Cells             | 72.6  | %  |
| <b>Total</b>      | 100   | %  |

Table S2: NMC111 cell composition from Crenna et al. [2]

| NMC111 Cell                                 | 1     | kg |
|---------------------------------------------|-------|----|
| Electrolyte                                 | 14.63 | %  |
| Separator                                   | 1.75  | %  |
| Anode paste                                 | 20.37 | %  |
| Cu current collector                        | 12.38 | %  |
| Cathode paste                               | 38.94 | %  |
| Al current collector                        | 5.34  | %  |
| Cell Container: plastic PET                 | 0.28  | %  |
| Cell Container: plastic PP                  | 0.13  | %  |
| Cell Container: aluminium                   | 1.82  | %  |
| Cell Container: aluminium positive terminal | 1.01  | %  |
| Cell Container: copper negative terminal    | 3.35  | %  |
| <b>Total</b>                                | 100   | %  |

Table S3: NMC111 cathode paste from Crenna et al. [2]

| Cathode                               | 1   | kg |
|---------------------------------------|-----|----|
| LiNMCO <sub>2</sub> (active material) | 89  | %  |
| Carbon black                          | 6   | %  |
| PVDF                                  | 5   | %  |
| <b>Total</b>                          | 100 | %  |

Table S4: NMC111 anode paste from Crenna et al. [2]

| Anode              | 1  | kg |
|--------------------|----|----|
| Synthetic graphite | 95 | %  |

|              |     |   |
|--------------|-----|---|
| PVDF         | 5   | % |
| <b>Total</b> | 100 | % |

Table S5: NMC811 cell composition from Crenna et al. [2]

| <b>NMC811 Cell</b>                          | <b>1</b> | <b>kg</b> |
|---------------------------------------------|----------|-----------|
| Electrolyte                                 | 16.83    | %         |
| Separator                                   | 1.82     | %         |
| Anode paste                                 | 21.81    | %         |
| Cu current collector                        | 12.43    | %         |
| Cathode paste                               | 37.73    | %         |
| Al current collector                        | 2.84     | %         |
| Cell Container: plastic PET                 | 0.28     | %         |
| Cell Container: plastic PP                  | 0.12     | %         |
| Cell Container: aluminium                   | 1.81     | %         |
| Cell Container: aluminium positive terminal | 1.03     | %         |
| Cell Container: copper negative terminal    | 3.3      | %         |
| <b>Total</b>                                | 100      | %         |

Table S6: NMC811 cathode paste from Crenna et al. [2]

| <b>Cathode</b>            | <b>1</b> | <b>kg</b> |
|---------------------------|----------|-----------|
| LiNMC02 (active material) | 89       | %         |
| Carbon black              | 6        | %         |
| PVDF                      | 5        | %         |
| <b>Total</b>              | 100      | %         |

Table S7: NMC811 anode paste from Crenna et al. [2]

| <b>Anode</b>       | <b>1</b> | <b>kg</b> |
|--------------------|----------|-----------|
| Synthetic graphite | 95       | %         |
| PVDF               | 5        | %         |
| <b>Total</b>       | 100      | %         |

Table S8: LFP cell composition from Peters et al. [3]

| <b>LFP Cell</b>      | <b>1</b> | <b>kg</b> |
|----------------------|----------|-----------|
| Electrolyte          | 16.62    | %         |
| Separator            | 1.25     | %         |
| Anode paste          | 19.70    | %         |
| Cu current collector | 9.14     | %         |
| Cathode paste        | 42.3     | %         |

|                                                   |       |   |
|---------------------------------------------------|-------|---|
| Al current collector                              | 3.9   | % |
| Cell Container:<br>Multilayer pouch               | 02.39 | % |
| Cell Container:<br>aluminium positive<br>terminal | 1.09  | % |
| Cell Container: copper<br>negative terminal       | 3.61  | % |
| <b>Total</b>                                      | 100   | % |

Table S9: LFP cathode paste from Peters et al. [3]

| <b>Cathode</b>     | <b>1</b> | <b>kg</b> |
|--------------------|----------|-----------|
| Synthetic graphite | 96       | %         |
| PVDF               | 2        | %         |
| Carbon black       | 2        | %         |
| <b>Total</b>       | 100      | %         |

Table S10: LFP anode paste from Peters et al. [3]

| <b>Anode</b>       | <b>1</b> | <b>kg</b> |
|--------------------|----------|-----------|
| Synthetic graphite | 95       | %         |
| PVDF               | 5        | %         |
| <b>Total</b>       | 100      | %         |

---

## II. Sensitivity analysis

Figure S1: Sensitivity analysis for different energy densities for the impact categories GWP, EP, AP and ADP

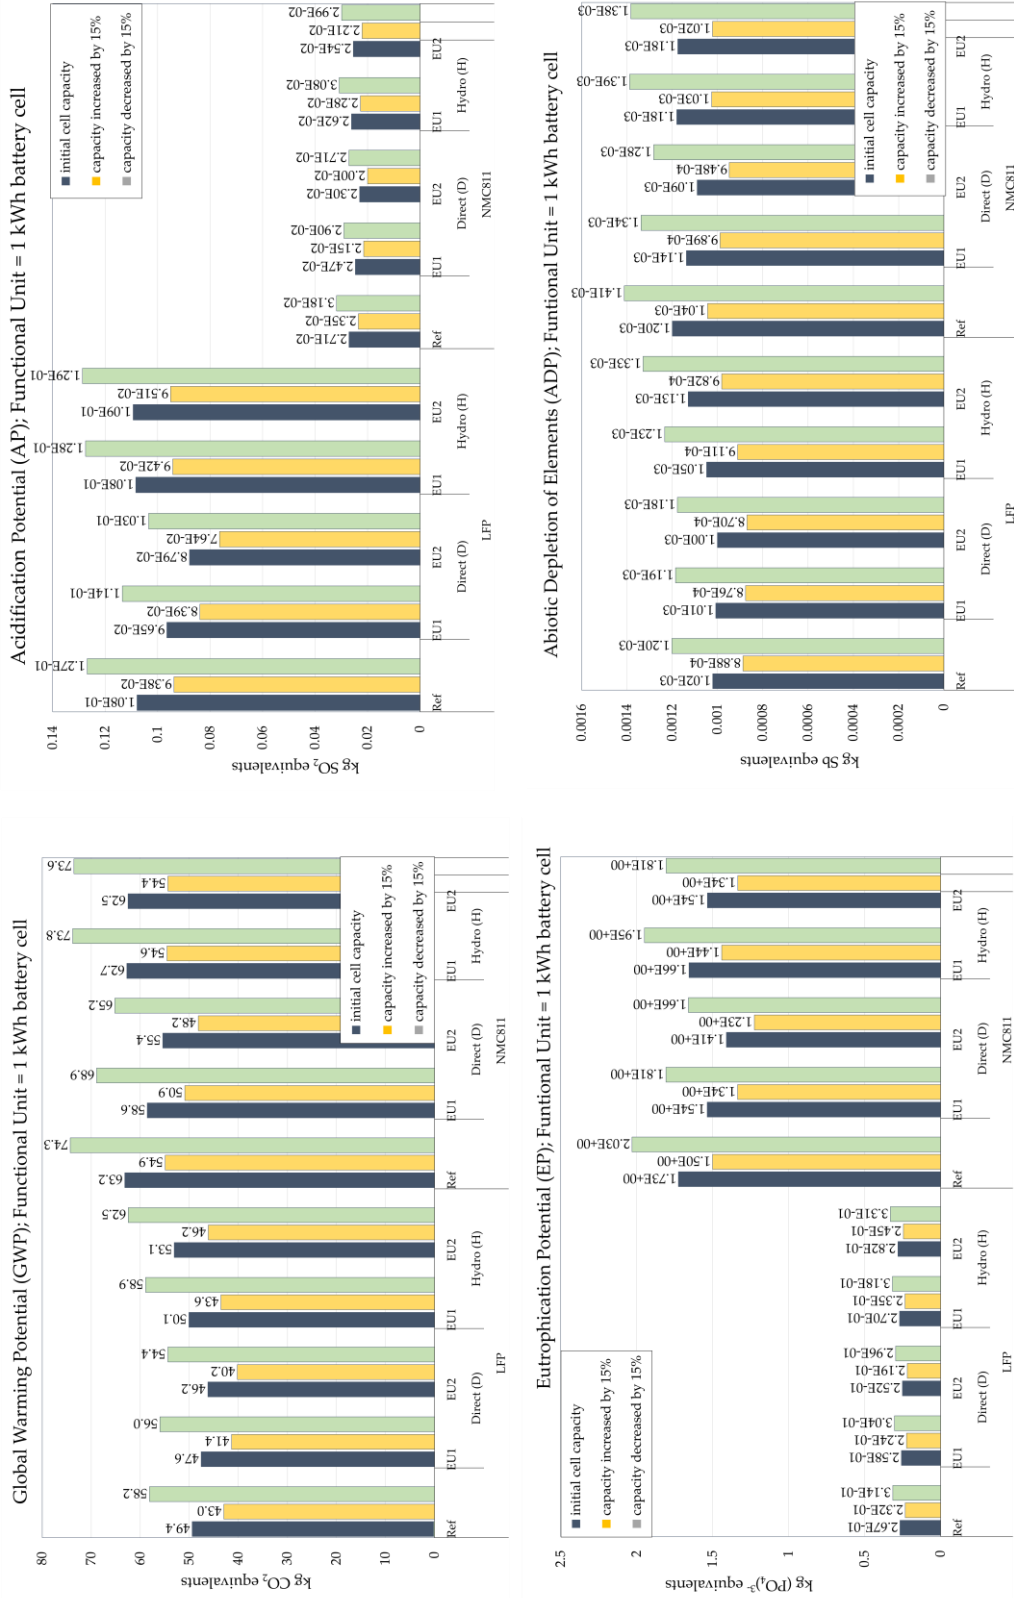

### III. Mass-proportional allocation

Figure S2: Mass-proportional allocation related to the functional unit of 1 kg cell material for the impact GWP, EP, AP and ADP

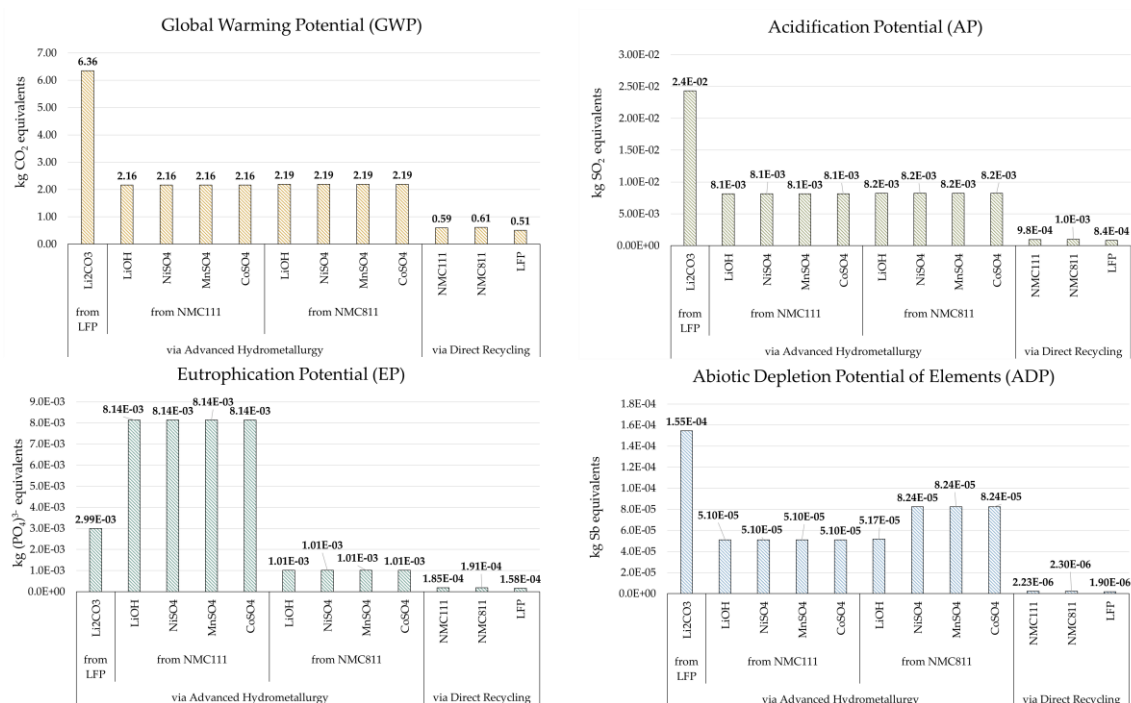

Figure S3: Mass-proportional allocation related to the functional unit of 1 kWh battery capacity for the impact categories GWP, EP, AP and ADP

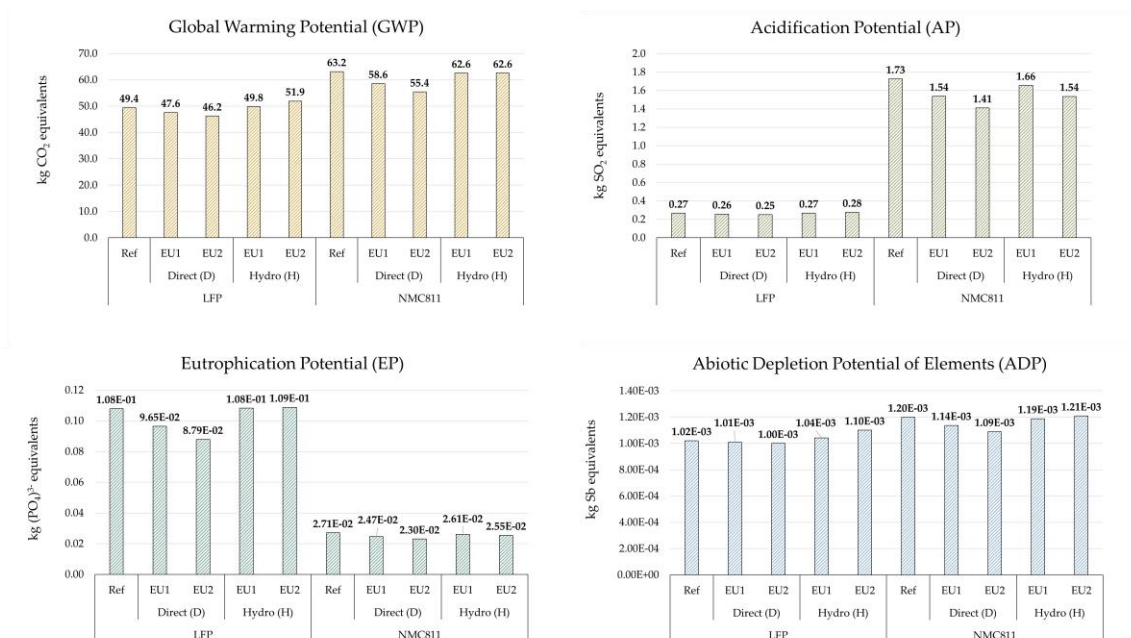

### IV. Pristine Materials Impact

Figure S4: Environmental impacts of pristine materials used for cell manufacturing presented for comparison reasons.



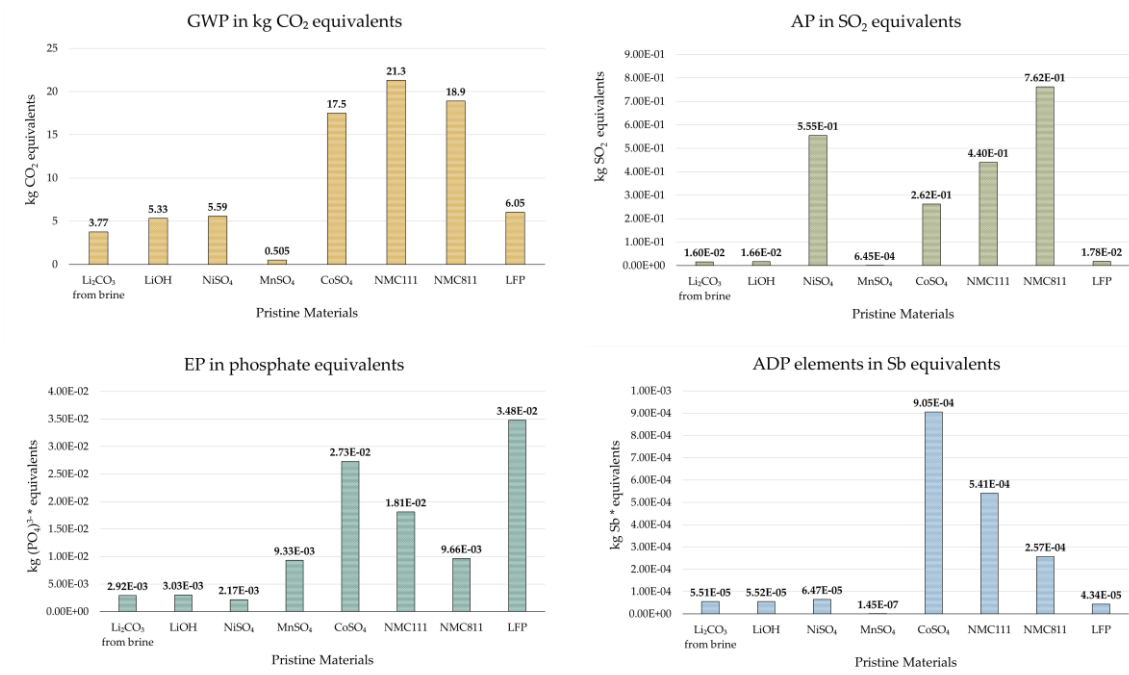

## V. Unit Processes Life Cycle Inventories

Table S11: Life Cycle Inventories of used unit processes.

| Process                                              |                         |                                           | Inputs                                                                      |                          |        | Outputs                                                                     |          |      |
|------------------------------------------------------|-------------------------|-------------------------------------------|-----------------------------------------------------------------------------|--------------------------|--------|-----------------------------------------------------------------------------|----------|------|
|                                                      |                         |                                           | Flow                                                                        | Quantity                 | Unit   | Flow                                                                        | Quantity | Unit |
| Waterjet-based direct recycling from Kurz et al. [4] | Dismantling             | Dismantling to cell level                 | Electricity [Electric power]                                                | 0.0409                   | MJ     | Aluminium [Metals]                                                          | 0.1791   | kg   |
|                                                      |                         |                                           | Traction battery [Battery recycling]                                        | 1                        | kg     | Battery cells [Battery recycling]                                           | 0.726    | kg   |
|                                                      |                         |                                           | Soaping agent [Operating materials]                                         | 2.27E-05                 | kg     | Copper [Metals]                                                             | 0.0031   | kg   |
|                                                      |                         |                                           | Cleaning rags [Battery recycling]                                           | 9.09E-05                 | kg     | GLO: electronic component, unspecified, at plant [Parts]                    | 0.0366   | kg   |
|                                                      |                         |                                           | Working gloves [Battery recycling]                                          | 9.09E-05                 | kg     | Polyethylene cross-linked (PEX) [Plastics]                                  | 0.0049   | kg   |
|                                                      |                         |                                           | Compressed air, 7 bar, average efficiency                                   | 0.00341                  | kg     | Polyethylene part (PE) [Plastic parts]                                      | 0.0011   | kg   |
|                                                      |                         |                                           | [Mechanical energy]                                                         |                          |        | Ethylene glycol [Organic intermediate products]                             | 0.043    | kg   |
|                                                      |                         |                                           |                                                                             | Steel part [Metal parts] | 0.0062 | kg                                                                          |          |      |
|                                                      |                         | Cell disassembly and electrode separation | Battery cells [Battery recycling]                                           | 0.726                    | kg     | Aluminium [Metals]                                                          | 0.0132   | kg   |
|                                                      |                         |                                           | Compressed air, 7 bar, average efficiency [Mechanical energy]               | 0.00341                  | Nm3    | CN: Cathode, lithium-ion battery, lithium manganese oxide, at plant [Parts] | 0.3289   | kg   |
|                                                      |                         |                                           | Electricity [Electric power]                                                | 0.0982                   | MJ     | Copper [Metals]                                                             | 0.1142   | kg   |
|                                                      |                         |                                           |                                                                             |                          |        | Graphite [Inorganic intermediate products]                                  | 0.1479   | kg   |
|                                                      |                         |                                           |                                                                             |                          |        | Polyethylene part (PE) [Plastic parts]                                      | 0.0025   | kg   |
|                                                      |                         |                                           |                                                                             |                          |        | Polyethylene terephthalate part (PET) [Plastic parts]                       | 0.0021   | kg   |
|                                                      |                         |                                           |                                                                             |                          |        | Polypropylene part (PP) [Plastic parts]                                     | 0.011    | kg   |
|                                                      | Electrode water-jetting |                                           | Working gloves [Battery recycling]                                          | 3.90E-06                 | kg     | Aluminium [Metals]                                                          | 0.0461   | kg   |
|                                                      |                         |                                           | Respiratory mask [Battery recycling]                                        | 2.00E-06                 | kg     | NMC black mass [Battery recycling]                                          | 0.23845  | kg   |
|                                                      |                         |                                           | CN: Cathode, lithium-ion battery, lithium manganese oxide, at plant [Parts] | 0.3289                   | kg     | Water (waste water, untreated) [Production residues in life cycle]          | 0.909    | kg   |
|                                                      |                         |                                           | Electricity [Electric power]                                                | 0.220896                 | MJ     |                                                                             |          |      |
|                                                      |                         |                                           |                                                                             |                          |        |                                                                             |          |      |
|                                                      |                         |                                           |                                                                             |                          |        |                                                                             |          |      |

|                                                                   |                                                                        |           |    |                                                           |        |    |
|-------------------------------------------------------------------|------------------------------------------------------------------------|-----------|----|-----------------------------------------------------------|--------|----|
|                                                                   | Sodium hydroxide (50%; caustic soda) [Inorganic intermediate products] | 0.0693602 | kg |                                                           |        |    |
|                                                                   | Water (decarbonised, softened) [Operating materials]                   | 0.909     | kg |                                                           |        |    |
| Drying                                                            | Electricity [Electric power]                                           | 0.098172  | MJ | NMC black mass [Battery recycling]                        | 0.2828 | kg |
|                                                                   | NMC black mass [Battery recycling]                                     | 0.2828    | kg |                                                           |        |    |
| Air purification                                                  | Activated carbon [Organic intermediate products]                       | 0.008     | kg | Activated carbon (charged) [Hazardous waste for recovery] | 0.008  | kg |
|                                                                   | Electricity [Electric power]                                           | 0.018     | MJ |                                                           |        |    |
| Packaging and sampling                                            | Electricity [Electric power]                                           | 0.008172  | MJ | Recyclate (NMC) [Other parts]                             | 0.171  | kg |
|                                                                   | NMC black mass [Battery recycling]                                     | 0.171     | kg |                                                           |        |    |
| <b>Advanced hydrometallurgical recycling from Mohr et al. [5]</b> |                                                                        |           |    |                                                           |        |    |
|                                                                   | Activated carbon [Organic intermediate products]                       | 0.0648    | kg | Aluminium [Metals]                                        | 0.2385 | kg |
|                                                                   | Electricity [Electric power]                                           | 4.932     | MJ | Cobalt compound (CoSO4) [Metals]                          | 0.181  | kg |
|                                                                   | Hydrated Lime [Minerals]                                               | 0.0796    | kg | Copper [Metals]                                           | 0.1173 | kg |
|                                                                   | Nitrogen liquid [Inorganic intermediate products]                      | 0.809     | kg | Electrolyte [Operating materials]                         | 0.1062 | kg |
|                                                                   | Oxygen liquid [Inorganic intermediate products]                        | 0.0956    | kg | Ethylene glycol [Organic intermediate products]           | 0.043  | kg |
|                                                                   | Quartz sand (silica sand; silicon dioxide) [Non renewable resources]   | 0.0796    | kg | GLO: electronic component, unspecified, at plant [Parts]  | 0.0366 | kg |
|                                                                   | Soda (sodium carbonate) [Inorganic intermediate products]              | 0.478     | kg | Graphite (from anode) [Materials]                         | 0.148  | kg |
|                                                                   | Sodium hydroxide (50%; caustic soda) [Inorganic intermediate products] | 0.191     | kg | Lithium compound (LiOH) [Metals]                          | 0.0701 | kg |
|                                                                   | Sulphuric acid (100%) [Inorganic intermediate products]                | 0.796     | kg | Manganese compound (MnSO4) [Metals]                       | 0.144  | kg |
|                                                                   | Traction battery [Battery recycling]                                   | 1         | kg | Nickel compound (NiSO4) [Metals]                          | 0.18   | kg |
|                                                                   |                                                                        |           |    | Plastic (unspecified) [Consumer waste]                    | 0.0216 | kg |
|                                                                   |                                                                        |           |    | Steel part [Metal parts]                                  | 0.0062 | kg |
| <b>Cell Manufacturing from Accardo et al. [6]</b>                 |                                                                        |           |    |                                                           |        |    |
|                                                                   | Aluminium sheet [Metals]                                               | 0.095     | kg | LIB Cell with LFP cathode [Systems]                       | 1      | kg |
|                                                                   | Carbon black [Organic intermediate products]                           | 0.027     | kg | n-Methyl pyrrolidone [Organic intermediate products]      | 0.003  | kg |
|                                                                   | CN: ethylene carbonate, at plant [organics]                            | 0.069     | kg |                                                           |        |    |
|                                                                   | Copper sheet [Metals]                                                  | 0.184     | kg |                                                           |        |    |
|                                                                   | Dimethyl carbonate [Organic intermediate products]                     | 0.069     | kg |                                                           |        |    |
|                                                                   | Electricity [Electric power]                                           | 5.04      | MJ |                                                           |        |    |
|                                                                   | Graphite [Inorganic intermediate products]                             | 0.211     | kg |                                                           |        |    |
|                                                                   | Lithium iron phosphate (LFP) powder [Valuable substances]              | 0.396     | kg |                                                           |        |    |
|                                                                   | Lithium-Hexafluorophosphate (LiPF6) [Minerals]                         | 0.025     | kg |                                                           |        |    |
|                                                                   | Polyethylene compound (PE) [Plastics]                                  | 0.004     | kg |                                                           |        |    |
|                                                                   | Polyethylene terephthalate-film (PET) [Plastic parts]                  | 0.003     | kg |                                                           |        |    |
|                                                                   | Polypropylene granulate (PP) [Plastics]                                | 0.016     | kg |                                                           |        |    |
|                                                                   | Polyvinylchloride-sheet (PVC) [Plastic parts]                          | 0.034     | kg |                                                           |        |    |
|                                                                   | RER: N-methyl-2-pyrrolidone, at plant [organics]                       | 0.003     | kg |                                                           |        |    |
|                                                                   | Thermal energy from natural gas (MJ) [Thermal energy]                  | 23.6      | MJ |                                                           |        |    |
| <b>LFP Hydrothermal Synthesis from Majeau-Bettez et al. [7]</b>   |                                                                        |           |    |                                                           |        |    |
|                                                                   | LiOH [Battery materials]                                               | 0.46      | kg | Lithium iron phosphate (LFP) powder [Valuable substances] | 1      | kg |
|                                                                   | Phosphoric acid [Inorganic intermediate products]                      | 0.65      | kg | Iron [ecoinvent long-term to fresh water]                 | 0.019  | kg |
|                                                                   | RER: iron sulphate, at plant [Beneficiation]                           | 1         | kg | Lithium, ion [ecoinvent long-term to fresh water]         | 0.1    | kg |
|                                                                   | Thermal energy from natural gas (MJ) [Thermal energy]                  | 15        | MJ | Phosphate [ecoinvent long-term to fresh water]            | 0.032  | kg |
|                                                                   | Water (deionised) [Operating materials]                                | 45        | MJ | Waste heat [Other emissions to air]                       | 1.5    | MJ |
| <b>NMC111 Synthesis from Dai et al. [1]</b>                       |                                                                        |           |    |                                                           |        |    |
|                                                                   | Ammonia (liquid, agrarian) [Agro chemicals]                            | 0.117     | kg | NMC111 cathode active material [Valuable substances]      | 1      | kg |
|                                                                   | CoSO4 [Battery materials]                                              | 0.541     | kg |                                                           |        |    |

|                                                                        |       |    |  |  |  |
|------------------------------------------------------------------------|-------|----|--|--|--|
| Electricity [Electric power]                                           | 25.2  | MJ |  |  |  |
| LiOH [Battery materials]                                               | 0.25  | kg |  |  |  |
| MnSO <sub>4</sub> [Battery materials]                                  | 0.523 | kg |  |  |  |
| NiSO <sub>4</sub> [Battery materials]                                  | 0.541 | kg |  |  |  |
| Sodium hydroxide (50%; caustic soda) [Inorganic intermediate products] | 0.844 | kg |  |  |  |
| Thermal energy (MJ) [Thermal energy]                                   | 42.6  | MJ |  |  |  |
| Water [Operating materials]                                            | 7.6   | kg |  |  |  |

## References

1. Dai, Q.; Kelly, J.C.; Gaines, L.; Wang, M. Life Cycle Analysis of Lithium-Ion Batteries for Automotive Applications. *Batteries* **2019**, *5*, 48, doi:10.3390/batteries5020048.
2. Crenna, E.; Gauch, M.; Widmer, R.; Wäger, P.; Hischer, R. Towards more flexibility and transparency in life cycle inventories for Lithium-ion batteries. *Resources, Conservation and Recycling* **2021**, *170*, 105619, doi:10.1016/j.resconrec.2021.105619.
3. Peters, J.F.; Baumann, M.; Binder, J.R.; Weil, M. On the environmental competitiveness of sodium-ion batteries under a full life cycle perspective – a cell-chemistry specific modelling approach. *Sustainable Energy Fuels* **2021**, *5*, 6414–6429, doi:10.1039/D1SE01292D.
4. Kurz, L.; Faryadras, M.; Klugius, I.; Reichert, F.; Scheibe, A.; Schmidt, M.; Wörner, R. Global Warming Potential of a New Waterjet-Based Recycling Process for Cathode Materials of Lithium-Ion Batteries. *Batteries* **2021**, *7*, 29, doi:10.3390/batteries7020029.
5. Mohr, M.; Peters, J.F.; Baumann, M.; Weil, M. Toward a cell-chemistry specific life cycle assessment of lithium-ion battery recycling processes. *Journal of Industrial Ecology* **2020**, *24*, 1310–1322, doi:10.1111/jiec.13021.
6. Accardo, A.; Dotelli, G.; Musa, M.L.; Spessa, E. Life Cycle Assessment of an NMC Battery for Application to Electric Light-Duty Commercial Vehicles and Comparison with a Sodium-Nickel-Chloride Battery. *Applied Sciences* **2021**, *11*, 1160, doi:10.3390/app11031160.
7. Majeau-Bettez, G.; Hawkins, T.R.; Strømman, A.H. Life cycle environmental assessment of lithium-ion and nickel metal hydride batteries for plug-in hybrid and battery electric vehicles. *Environ. Sci. Technol.* **2011**, *45*, 4548–4554, doi:10.1021/es103607c.
